# Supplementary material
Source: Springer Nature journal article supplement (https://www.springermedizin.de/resource/supplementary/12875_2011_603_MOESM1_ESM.pdf/9435042)

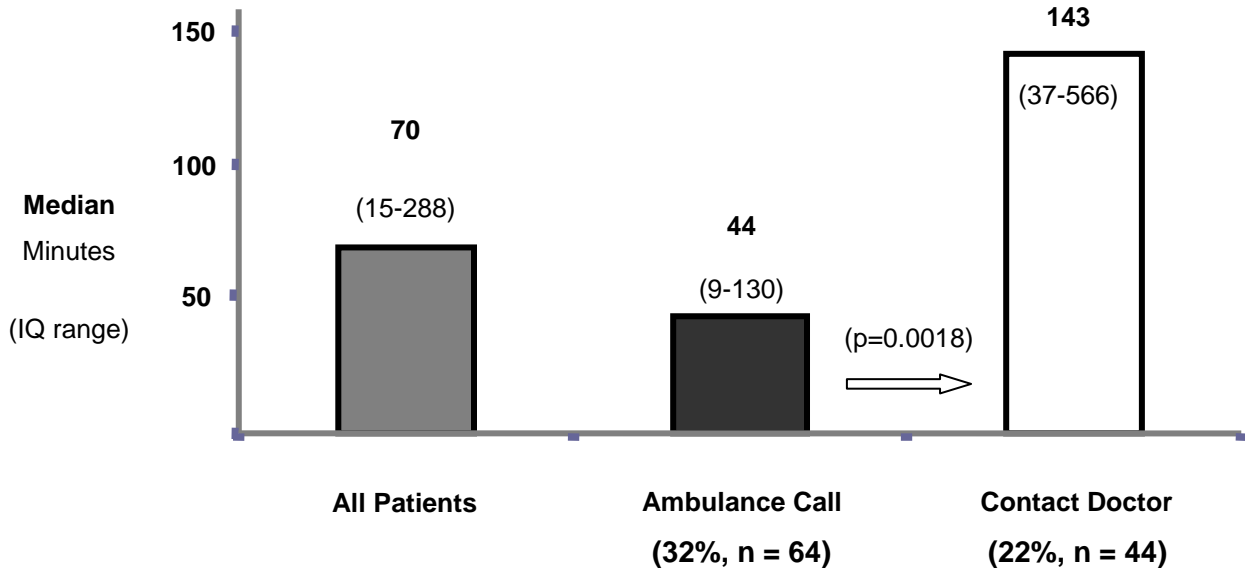

Supplement: MOESM1 [file 9435042]
